# Supplementary material for: Volatile loss following cooling and accretion of the Moon revealed by chromium isotopes
Source: PubMed Central journal article supplement — Proc Natl Acad Sci U S A. 2018 Oct 8;115(43):10920–5. doi: 10.1073/pnas.1809060115 (PMC6205496; doi:10.1073/pnas.1809060115), 2018-10-08
Supplement: pnas.1809060115.sapp.pdf [file pnas.1809060115.sapp.pdf]

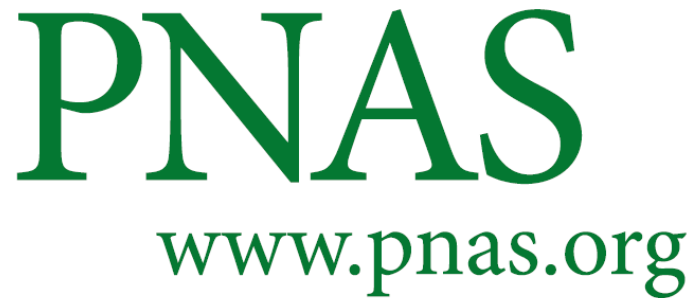

## Supporting Information for

### Volatile loss following cooling and accretion of the Moon revealed by chromium isotopes

Paolo A. Sossi<sup>a\*</sup>, Frédéric Moynier<sup>a, b</sup>, Kirsten van Zuilen<sup>a, ^</sup>

<sup>a</sup> Institut de Physique du Globe de Paris, Université Paris Diderot, Université Sorbonne Paris Cité, CNRS UMR 7154, 1 rue Jussieu, 75238 Paris Cedex 05, France

<sup>b</sup> Institut Universitaire de France, Paris, France

<sup>^</sup>Present address: Department of Earth Sciences, Vrije Universiteit Amsterdam, 1081 HV Amsterdam, The Netherlands

\* Corresponding author: [sossi@ipgp.fr](mailto:sossi@ipgp.fr)

#### **This PDF file includes:**

Supporting Information Text

Figs. S1 to S3

Tables S1 to S12

References for SI reference citations

## Supporting Information Text

### Sample selection and description

Komatiite samples were chosen to characterise the chromium isotope composition of the bulk silicate Earth for several reasons; *i*) they are the products of high degrees of melting ( $\geq 25\%$  (1)) of the mantle and *ii*) these high degrees of melting, coupled with high pressures, require mantle potential temperatures in excess of ambient mantle (2). As the magnitude of equilibrium mass-dependent isotopic fractionation is proportional to  $1/T^2$  (3), both of these features act to dampen the extent of isotopic fractionation between the melt and the source of the komatiites (4). These sources themselves are often near-primitive, having experienced  $\leq 5\%$  prior melt extraction, offering little scope for isotopic disturbance and thereby reflecting that of the primitive mantle. Komatiites have been used successfully in a variety of stable isotopic studies to assess the composition of the bulk silicate earth (5–8). Furthermore, when coupled with modern peridotites, komatiites also afford the opportunity of assessing temporal variations in the Cr isotopic composition of Earth's mantle. This analysis is complementary to that based on evidence from igneous rocks that the Cr abundance of the mantle has remained constant to at least 3.9 Ga (9).

Komatiite samples showing an olivine spinifex texture of the order of mm to cm, coming from the upper, A1 and A2 zones of komatiite flows, were preferentially selected for this study. This is because these samples are more likely to represent quenched liquids (10–12) than do samples from other zones in komatiite flows (A3 and B zones), which crystallised under a thermal gradient and accumulated olivine, respectively (13). The komatiites come from five cratons, comprising the 3.48 Ga Komati formation of the Barberton Greenstone Belt, Kaapvaal craton (49J, 331/783, 331/777A, 331/790, 331/779); 2.7 Ga Reliance formation of the Belingwe Greenstone Belt, Zimbabwe craton (B-R1); the 3.515 Ga Coonterunah (179/751) and 3.2 Ga Regal formation (176/723) of the Pilbara craton; the 2.7 Ga Scotia (SD5/354.5; SD6/400) and Marshall Pool (331/948) groups of the Yilgarn craton; and the 2.7 Ga Pyke Hill locality of the Munro Township, Abitibi Belt, (422/84, 422/94, 422/95, 422/96) and the Red Lake greenstone belt (RL-12-1 (14)), Superior Craton. They include a combination of both aluminium-depleted and -undepleted types. The reader is referred to refs. (4, 12) for in-depth petrographic, geochemical and petrologic descriptions of these samples.

The lunar samples reflect a wide range of igneous rocks, with the purpose of gaining a representative cross-section of the composition of the lunar mantle, which is known to be heterogeneous mineralogically (15, 16). As such mineralogical variation has been shown to induce stable isotopic fractionation (for example, iron in lunar mare basalts (17)), it is important to assess whether the Cr

isotope composition of the Moon can be satisfactorily determined with extant lunar return samples. In view of minimising possible isotopic fractionation induced by a lunar magma ocean (see refs. (18, 19) for examples with Fe), samples from the cumulate Mg Suite were selected. These samples are a set of consanguineous rocks that now have metamorphic textures (20) and are typified by their high Mg#s and anorthite contents in plagioclase, coupled with depletions in compatible elements, and, in some cases, enrichment in incompatible trace elements typical of KREEP (potassium-rare-earth-element-phosphorus) (21, 22). These features are interpreted to reflect *i*) their primitive, largely olivine-bearing source that must have been among the first to crystallise from a lunar magma ocean (23), as reflected in their  $\approx 4.4$  Ga ages, one of the oldest products of lunar magmatism and *ii*) the precipitation of metallic iron, likely during the ascent of their parent magma (19, 24). As such, they are able to provide insights into the initial stages of lunar formation, prior to the formation of the lunar mare basalts. Furthermore, as they are likely cogenetic (21), their magmatic evolution may be interpreted together using crystal-liquid equilibria constraints, allowing the effect of magmatic differentiation to be quantified.

The samples studied include a dunite (72415), a troctolite (76535), and four norites (78238, 78235, 15445 and 15455). Mare basalts of both the High Ti- (10003, 10057, 70135) and Low Ti groups (12002, 15555) were selected, in order to assess the impact of differing source regions on the isotope composition of chromium. In addition, the lunar green glass (15426) was also analysed, due to its distinct composition in terms of volatile elements and its high Mg# and therefore primitive source region (25, 26). The deposition of sublimates of volatile metals (including Fe and Cr) may also cause fractionation in its isotopic composition (see discussion in ref. (19)). Further information on these samples is provided in the lunar sample compendium (<https://curator.jsc.nasa.gov/lunar/lsc/index.cfm>), and refs. (19) and (21) and references therein.

### Modelling Cr isotope evolution in the lunar Mg Suite

The Mg Suite samples are phaneritic, cumulate rocks that now possess metamorphic textures (20). Their bulk composition is a reflection of that of their constituent minerals, facilitating calculation of mineral modes by least-squares chi-squared minimisation:

$$\chi^2 = \sum_i (\sum_n f_n X_n^i - X_{WR}^i)^2 \quad (S1)$$

Where  $X^i$  is the concentration of the  $i$ th oxide in the  $n$ th phase or whole rock (WR), where the sum is performed over all major oxides ( $i$ ); SiO<sub>2</sub>, Al<sub>2</sub>O<sub>3</sub>, FeO, MgO and CaO. Mineral compositions come from refs. (27, 28). Calculated mineral modes, compositions and  $\chi^2$  values are given in Table S1.



A model is also presented in which a parent magma (19, 20) with 13 wt. % MgO, 10 wt. % FeO, 2300 ppm Cr, and  $\delta^{53}\text{Cr} = -0.24$  ‰ undergoes fractional crystallization at fractions ( $f$ ) of 0.05. The oxygen fugacity is set to IW-1 ( $\log f\text{O}_2 = -10.71$  at 1300°C), and the resulting  $\text{Cr}^{2+}/\Sigma\text{Cr}$  ratio in the magma is calculated as:

$$\frac{\text{Cr}^{2+}}{\Sigma\text{Cr}} = \frac{1}{\left(1 + 10^{\left(\frac{1}{4}\log f\text{O}_2 + \log K\right)}\right)}, \quad (\text{S2})$$

where  $\log K = 1.9$  (29), giving  $\text{Cr}^{2+}/\Sigma\text{Cr} = 0.86$ . Temperature at 1 bar, anhydrous, is calculated according to the relation (12):

$$T^\circ\text{C} (1 \text{ bar}) = 1091 + 16 \times \text{MgO} (\text{wt. \%}) \quad (\text{S3})$$

Yielding 1299 °C for the parent magma. The partitioning of Fe and Mg between olivine and orthopyroxene and the melt is governed by the equation (30):

$$K_{D_{\text{Fe-Mg}}^{\text{Ol,OpX-Melt}}} = \frac{\left(\frac{\text{XFe}}{\text{XMg}}\right)_{\text{Ol,OpX}}}{\left(\frac{\text{XFe}}{\text{XMg}}\right)_{\text{Melt}}} = 0.30. \quad (\text{S4})$$

Partition coefficients for  $\text{Cr}^{2+}$  and  $\text{Cr}^{3+}$  between olivine (31), orthopyroxene (32) and melt are:

$$D_{\text{Cr}}^{\text{Ol-Melt}} = 0.66 \left(\frac{10^4}{T(\text{K})}\right) - 4.48 \quad (\text{S5})$$

$$D_{\text{Cr}^{2+}}^{\text{OpX-Melt}} = -0.0045 \times T(\text{K}) + 7.70 \quad (\text{S6})$$

$$D_{\text{Cr}^{3+}}^{\text{OpX-Melt}} = -0.0561 \times T(\text{K}) + 94.6 \quad (\text{S7})$$

Chromite was assumed to contain 50 wt. %  $\text{Cr}_2\text{O}_3$ .

The  $^{53}\text{Cr}/^{52}\text{Cr}$  fractionation factor is given by the following equation (33), which accounts for the different  $\text{Cr}^{2+}/\Sigma\text{Cr}$  ratios between two phases,  $A$  and  $B$ :

$$\Delta^{53}\text{Cr}_{A-B} = 0.35 \times \left( \left(\frac{\text{Cr}^{2+}}{\Sigma\text{Cr}}\right)_B - \left(\frac{\text{Cr}^{2+}}{\Sigma\text{Cr}}\right)_A \right) \times \frac{10^6}{T^2}. \quad (\text{S8})$$

Output results for each phase in the model are shown in Tables S2-S7.

**Table S2: Melt**

| F    | T    | P | MgO (wt %) | FeO (wt %) | Mg#   | Cr <sup>2+</sup> | Cr <sup>3+</sup> | Cr   | $\Delta^{53}\text{Cr}_{\text{Min-Melt}}$ | $\delta^{53}\text{Cr}_{\text{Melt}}$ |
|------|------|---|------------|------------|-------|------------------|------------------|------|------------------------------------------|--------------------------------------|
| 0    | 1299 |   | 13.0       | 10.0       | 0.699 | 1971             | 329              | 2300 | -0.01                                    | -0.24                                |
| 0.05 | 1271 |   | 11.3       | 9.9        | 0.669 | 1987             | 332              | 2319 | -0.01                                    | -0.24                                |
| 0.1  | 1256 |   | 10.3       | 10.1       | 0.646 | 2031             | 339              | 2369 | -0.01                                    | -0.24                                |
| 0.15 | 1241 |   | 9.4        | 10.2       | 0.620 | 2081             | 347              | 2428 | -0.01                                    | -0.24                                |
| 0.2  | 1231 |   | 8.7        | 10.5       | 0.598 | 2155             | 360              | 2515 | -0.01                                    | -0.24                                |
| 0.25 | 1219 |   | 8.0        | 10.7       | 0.571 | 2231             | 372              | 2604 | -0.01                                    | -0.24                                |
| 0.3  | 1197 |   | 6.6        | 10.7       | 0.525 | 2277             | 380              | 2657 | 0.03                                     | -0.25                                |
| 0.35 | 1184 |   | 5.8        | 11.0       | 0.485 | 2379             | 128              | 2507 | 0.07                                     | -0.26                                |
| 0.4  | 1176 |   | 5.3        | 11.6       | 0.450 | 2519             | 41               | 2560 | 0.10                                     | -0.28                                |
| 0.45 | 1173 |   | 5.2        | 11.7       | 0.441 | 2594             | 42               | 2636 | 0.13                                     | -0.31                                |

**Table S3: Olivine**

| F    | T    | P    | MgO (wt %) | FeO (wt %) | Mg#   | Cr <sup>2+</sup> | Cr <sup>3+</sup> | Cr   | $\Delta^{53}\text{Cr}_{\text{Ol-Melt}}$ |
|------|------|------|------------|------------|-------|------------------|------------------|------|-----------------------------------------|
| 0    | 1299 | 1    | 48.3       | 11.1       | 0.886 | 1659             | 277              | 1936 | -0.02                                   |
| 0.05 | 1271 | 0.75 | 47.2       | 12.4       | 0.871 | 1901             | 317              | 2218 | -0.02                                   |
| 0.1  | 1256 | 0.65 | 46.3       | 13.6       | 0.859 | 2082             | 347              | 2429 | -0.02                                   |
| 0.15 | 1241 | 0.55 | 45.3       | 14.8       | 0.845 | 2271             | 379              | 2650 | -0.02                                   |
| 0.2  | 1231 | 0.5  | 44.3       | 15.9       | 0.832 | 2451             | 409              | 2860 | -0.02                                   |
| 0.25 | 1219 | 0.5  | 43.2       | 17.3       | 0.816 | 2658             | 444              | 3101 | -0.02                                   |
| 0.3  | 1197 | 0.25 | 41.2       | 19.8       | 0.787 | 2943             | 491              | 3435 | -0.02                                   |

**Table S4: Orthopyroxene**

| F    | T    | P    | MgO (wt %) | FeO (wt %) | Mg#   | Cr <sup>2+</sup> | Cr <sup>3+</sup> | Cr   | $\Delta^{53}\text{Cr}_{\text{Opx-Melt}}$ |
|------|------|------|------------|------------|-------|------------------|------------------|------|------------------------------------------|
| 0.3  | 1197 | 0.24 | 29.6       | 13.9       | 0.791 | 2163             | 3040             | 5204 | 0.11                                     |
| 0.35 | 1184 | 0.5  | 28.3       | 15.6       | 0.763 | 2363             | 1087             | 3450 | 0.06                                     |
| 0.4  | 1176 | 0.5  | 27.1       | 17.2       | 0.737 | 2623             | 332              | 2955 | 0.02                                     |
| 0.45 | 1173 | 0.5  | 26.8       | 17.7       | 0.730 | 2817             | 28               | 2845 | 0.01                                     |

**Table S5: Plagioclase**

| F    | T    | P    |
|------|------|------|
| 0.05 | 1271 | 0.25 |
| 0.1  | 1256 | 0.35 |
| 0.15 | 1241 | 0.45 |
| 0.2  | 1231 | 0.5  |
| 0.25 | 1219 | 0.5  |
| 0.3  | 1197 | 0.5  |
| 0.35 | 1184 | 0.5  |
| 0.4  | 1176 | 0.5  |
| 0.45 | 1173 | 0.5  |

**Table S6: Chromite**

| F    | T    | P      | MgO (wt %) | FeO (wt %) | Mg# | Cr <sup>2+</sup> | Cr <sup>3+</sup> | Cr     | $\Delta^{53}\text{Cr}_{\text{Chr-Melt}}$ |
|------|------|--------|------------|------------|-----|------------------|------------------|--------|------------------------------------------|
| 0.3  | 1197 | 0.001  |            |            |     | 0                | 342105           | 342105 | 0.19                                     |
| 0.35 | 1184 | 0.0005 |            |            |     | 0                | 342105           | 342105 | 0.19                                     |
| 0.4  | 1176 | 0.0005 |            |            |     | 0                | 342105           | 342105 | 0.19                                     |
| 0.45 | 1173 | 0.0003 |            |            |     | 0                | 342105           | 342105 | 0.19                                     |

**Table S7: Instantaneous Cumulate**

| F    | T    | P | MgO (wt %) | FeO (wt %) | Mg#   | Cr <sup>2+</sup> | Cr <sup>3+</sup> | Cr   | $\Delta^{53}\text{Cr}_{\text{Min-Melt}}$ | $\delta^{53}\text{Cr}_{\text{cumulate}}$ |
|------|------|---|------------|------------|-------|------------------|------------------|------|------------------------------------------|------------------------------------------|
| 0    | 1299 |   | 48.3       | 11.1       | 0.886 | 1659             | 277              | 1936 | -0.01                                    | -0.26                                    |
| 0.05 | 1271 |   | 35.4       | 9.3        | 0.871 | 1426             | 238              | 1664 | -0.01                                    | -0.26                                    |
| 0.1  | 1256 |   | 30.1       | 8.8        | 0.859 | 1353             | 226              | 1579 | -0.01                                    | -0.26                                    |
| 0.15 | 1241 |   | 24.9       | 8.1        | 0.845 | 1249             | 209              | 1458 | -0.01                                    | -0.26                                    |
| 0.2  | 1231 |   | 22.2       | 8.0        | 0.832 | 1225             | 205              | 1430 | -0.01                                    | -0.26                                    |
| 0.25 | 1219 |   | 21.6       | 8.7        | 0.816 | 1329             | 222              | 1551 | -0.01                                    | -0.26                                    |
| 0.3  | 1197 |   | 17.4       | 8.3        | 0.789 | 1282             | 1213             | 2495 | 0.03                                     | -0.18                                    |
| 0.35 | 1184 |   | 14.1       | 7.8        | 0.763 | 1237             | 648              | 1886 | 0.07                                     | -0.17                                    |
| 0.4  | 1176 |   | 13.5       | 8.6        | 0.737 | 1311             | 337              | 1648 | 0.10                                     | -0.16                                    |
| 0.45 | 1173 |   | 13.3       | 8.8        | 0.730 | 1408             | 117              | 1525 | 0.13                                     | -0.13                                    |

The compositions of the highlands Mg Suite cumulates are then made from combinations of olivine, orthopyroxene, plagioclase and chromite that crystallised in the model.

**Table S8:** Re-constructed compositions of Mg Suite cumulates from the crystallisation model.

|                   | MgO (wt. %) | FeO (wt. %) | Cr (ppm) | $\delta^{53}\text{Cr}$ |
|-------------------|-------------|-------------|----------|------------------------|
| <b>72415</b>      |             |             |          |                        |
| 95% Olivine       | 47.2        | 12.4        | 2219     | -0.26                  |
| 5% Plagioclase    | 0           | 0           | 0        |                        |
| Whole Rock        | 44.8        | 11.8        | 2108     | -0.26                  |
| <b>76535</b>      |             |             |          |                        |
| 39% Olivine       | 47.2        | 12.4        | 2219     | -0.27                  |
| 61% Plagioclase   | 0           | 0           | 0        |                        |
| Whole Rock        | 18.4        | 4.9         | 865      | -0.27                  |
| <b>78238/5</b>    |             |             |          |                        |
| 40% Orthopyroxene | 29.6        | 13.9        | 3450     | -0.14                  |
| 60% Plagioclase   | 0           | 0           | 0        |                        |
| Whole Rock        | 11.84       | 5.57        | 1380     | -0.14                  |
| <b>15455</b>      |             |             |          |                        |
| 25% Orthopyroxene | 28.3        | 15.6        | 3450     | -0.14                  |
| 75% Plagioclase   | 0           | 0           | 0        |                        |
| Whole Rock        | 7.4         | 4.1         | 897      | -0.14                  |
| <b>15445</b>      |             |             |          |                        |
| 15455 WR          | 7.4         | 4.1         | 8.97     | -0.14                  |
| + .25% Chromite   |             |             | 342105   | -0.06                  |
| Whole Rock        | 7.1         | 3.90        | 1579     | -0.10                  |

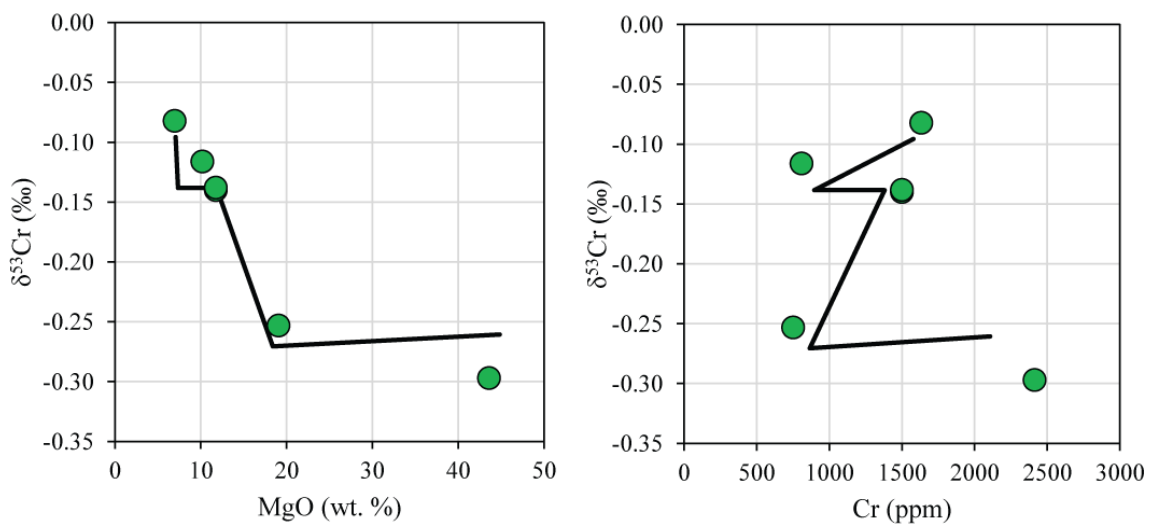

**Figure S1.** Variation of  $\delta^{53}\text{Cr}$  (‰) against a) MgO (wt. %) and b) Cr (ppm), as measured (green circles) and modelled (black lines).



## Assessment of the composition of the Earth's mantle and the Moon

### *Bulk Silicate Earth (BSE)*

Previous estimates of the BSE included rocks that were not representative of Earth's mantle (*e.g.*, wherlites, amphibolites; (34, 35)) and, based on the mechanisms presented above, may have therefore experienced prior Cr isotope fractionation following extraction of their precursor magma from the mantle. Furthermore, many peridotites used in these former studies experienced varying degrees of depletion, which may equally have altered their Cr isotope composition relative to primitive mantle. A compilation of literature data for peridotites that are fertile, unmetasomatised with Cr contents of  $2520 \pm 630$  ppm, Mg# (molar Mg/(Mg+Fe)) between 0.885 and 0.910, and >2 wt. % Al<sub>2</sub>O<sub>3</sub>; along with spinifex-texture komatiites (from this study) is presented in Table S9.

**Table S9:** Compilation of Cr isotope data for terrestrial ultramafic rocks.

| Locality                       | Sample Name | $\delta^{53}\text{Cr}$<br>(‰ vs. SRM-979) | $\pm 2\text{SD}$ | Cr (ppm) | Mg#   | Grubb's<br>Test |
|--------------------------------|-------------|-------------------------------------------|------------------|----------|-------|-----------------|
| <b>Xia et al., 2017</b>        |             |                                           |                  |          |       |                 |
| Shavaryn                       | Sh11-1x     | -0.08                                     | 0.05             | 2532     | 0.891 |                 |
|                                | Sh11-4x     | -0.22                                     | 0.05             | 2737     | 0.896 | x               |
|                                | Sh11-15x    | -0.20                                     | 0.04             | 2600     | 0.898 | x               |
|                                | Sh11-22x    | 0.06                                      | 0.05             | 2600     | 0.909 | x               |
|                                | Sh11-48x    | -0.13                                     | 0.04             | 2599     | 0.895 |                 |
|                                | Sh11-58x    | -0.16                                     | 0.04             | 2736     | 0.899 |                 |
|                                | Sh11-59x    | 0.05                                      | 0.04             | 2258     | 0.901 | x               |
|                                | Sh11-65x    | -0.10                                     | 0.04             | 2326     | 0.894 |                 |
|                                | 4230-15Lhz  | -0.09                                     | 0.04             | 1984     | 0.904 |                 |
| Haer                           | H11-1       | -0.24                                     | 0.04             | 2462     | 0.898 | x               |
|                                | H11-3       | -0.05                                     | 0.04             | 2531     | 0.888 |                 |
|                                | H11-10      | -0.17                                     | 0.05             | 2668     | 0.905 |                 |
|                                | H11-14      | -0.13                                     | 0.04             | 2531     | 0.893 |                 |
| Udachnya                       | U-85        | -0.10                                     | 0.04             | 2846     | 0.896 |                 |
| Hannuoba                       | DMP04       | -0.12                                     | 0.04             | 2477     | 0.911 |                 |
|                                | DMP41       | -0.07                                     | 0.04             | 2736     | 0.902 |                 |
|                                | DMP58       | -0.11                                     | 0.04             | 2326     | 0.897 |                 |
|                                | DMP60       | -0.21                                     | 0.04             | 2668     | 0.899 | x               |
| <b>Schoenberg et al., 2008</b> |             |                                           |                  |          |       |                 |
| Val Moleno Lherzolite          | CH70-5      | -0.125                                    | 0.048            | 2103     |       |                 |
| Harz Mtns                      | GZG1275/4   | -0.111                                    | 0.048            | 2274     |       |                 |
| <b>Schoenberg et al., 2016</b> |             |                                           |                  |          |       |                 |
| Finero Lherzolite              | MIH-Per1    | -0.071                                    | 0.048            | 2273     |       |                 |

|           |           |        |       |      |
|-----------|-----------|--------|-------|------|
| Harz Mtns | GZG1275/4 | -0.143 | 0.048 | 2639 |
|-----------|-----------|--------|-------|------|

**Sossi et al. this work**

|                                                 |           |                                          |                                    |                                    |                       |
|-------------------------------------------------|-----------|------------------------------------------|------------------------------------|------------------------------------|-----------------------|
| Komati Fm, Barberton                            | 49J       | -0.065                                   | 0.041                              | 3190                               | 0.839                 |
| Reliance Fm, Belingwe                           | B-R1      | -0.155                                   | 0.035                              | 2650                               | 0.824                 |
| Coonterunah Fm, E. Pilbara                      | 179-751   | -0.122                                   | 0.066                              | 3240                               | 0.797                 |
| Regal Fm., W. Pilbara                           | 176-723   | -0.122                                   | 0.048                              | 2450                               | 0.869                 |
| Scotia, Yilgarn                                 | SD5-354.5 | -0.121                                   | 0.017                              | 3050                               | 0.806                 |
| Komati Fm., Barberton                           | 331/783   | -0.082                                   | 0.039                              | 2894                               | 0.797                 |
| Komati Fm., Barberton                           | 331-777A  | -0.114                                   | 0.012                              | 2717                               | 0.794                 |
| Munro, Superior                                 | 422-94    | -0.147                                   | 0.035                              | 3464                               | 0.788                 |
| Munro, Superior                                 | 422-95    | -0.168                                   | 0.059                              | 3260                               | 0.794                 |
| Munro, Superior                                 | 422-84    | -0.112                                   | 0.004                              | 2902                               | 0.854                 |
| Red Lake, Superior                              | RL-12-1   | -0.111                                   | 0.010                              | 1351                               | 0.692                 |
| Komati Fm., Barberton                           | 331/790   | -0.132                                   | 0.006                              | 3371                               | 0.799                 |
| Munro, Superior                                 | 422/96    | -0.097                                   | 0.001                              | 3060                               | 0.867                 |
| Scotia, Yilgarn                                 | SD6/400   | -0.098                                   | 0.004                              | 2428                               | 0.828                 |
| Munro, Superior                                 | 422/96a   | -0.085                                   | 0.001                              | 3060                               | 0.867                 |
| Marshall Pool, Yilgarn                          | 331/948   | -0.104                                   | 0.004                              | 2915                               | 0.753                 |
| Komati Fm., Barberton                           | 331/779   | -0.097                                   | 0.004                              | 2706                               | 0.820                 |
| Dunite, Twin Sisters                            | DTS-1     | -0.127                                   | 0.007                              | 3990                               | 0.919                 |
| Peridotite, Cazadero                            | PCC-1     | -0.083                                   | 0.004                              | 2730                               | 0.912                 |
| Dunite, Twin Sisters                            | DTS-1a    | -0.123                                   | 0.003                              | 3990                               | 0.919                 |
|                                                 |           | <b><math>\delta^{53}\text{Cr}</math></b> | <b><math>\pm 2\text{SD}</math></b> | <b><math>\pm 2\text{SE}</math></b> | <b><math>n</math></b> |
| <b>Average Earth mantle</b>                     |           | <b>-0.114</b>                            | <b>0.056</b>                       | <b>0.040</b>                       | <b>42</b>             |
| <b>Average Earth mantle (outliers excluded)</b> |           | <b>-0.112</b>                            | <b>0.029</b>                       | <b>0.020</b>                       | <b>36</b>             |

The Anderson-Darling test for normality on the above dataset after filtering has a D value of 0.184, which is smaller than the critical value,  $c$  of 0.734 (at a confidence level of 0.05). This attests that the data for the BSE is normally distributed and the 2SE value can be used as an uncertainty of the mean value.

*Moon*

In a study of the Cr isotope composition of lunar mare basalts, Bonnand and co-workers (36) found a systematic effect of magmatic differentiation on the  $\delta^{53}\text{Cr}$  values. Partially cumulate magmas were found to be isotopically heavy (up to  $\approx -0.15\%$ ), whereas magmas that had experienced crystal fractionation of chromite and/or pyroxene tended to be isotopically light (down to  $\approx -0.30\%$ ). These authors found the data could be fit by a  $\Delta^{53}\text{Cr}_{\text{min-melt}}$  fractionation factor =  $-0.15\%$ , consistent with the *ab-initio* calculations (33). In order to minimise the potential effect of chromite and pyroxene precipitation in skewing the database of lunar mare basalts used to calculate the Cr isotope composition of the lunar mantle, petrologic filtering was undertaken (see main text).

**Table S10.** Petrology, geochemistry and  $K_D^{\text{Fe-Mg}}$  modelling of lunar mare basalts.

| Sample         |                                                                                                           | Cr          | MgO          | FeO          | Mg#          | Mg#         | Mg#                       | MgO                  | FeO                  | Mg#                    |             |
|----------------|-----------------------------------------------------------------------------------------------------------|-------------|--------------|--------------|--------------|-------------|---------------------------|----------------------|----------------------|------------------------|-------------|
| <b>Low Ti</b>  |                                                                                                           | (ppm)       | (wt. %)      | (wt. %)      | WR           | Ol/Px       | Melt Predict <sup>1</sup> | Predict <sup>1</sup> | Predict <sup>1</sup> | melt calc <sup>2</sup> | fOl/px      |
| 12002          | Ol suite.                                                                                                 | 5949        | 14.88        | 21.66        | 0.551        | 0.76        | 0.49                      | 11.5                 | 21.6                 | 0.49                   | 0.12        |
| <b>12016</b>   | <b>Ilm suite. Primitive olivine basalt, resorbed Ol.</b>                                                  | <b>3680</b> | <b>12.65</b> | <b>22.64</b> | <b>0.499</b> | <b>0.72</b> | <b>0.44</b>               | <b>9.7</b>           | <b>22.3</b>          | <b>0.44</b>            | <b>0.10</b> |
| 12040          | Ol suite. Olivine + chromite cumulate.                                                                    | 3650        | 16.1         | 20.9         | 0.579        | 0.72        | 0.44                      | 8.5                  | 19.2                 | 0.44                   | 0.27        |
| 12051          | Ilm suite. Evolved basalt (no ol except minor fayalite), no cumulus phases (37)                           | 1720        | 6.4          | 20.19        | 0.361        | 0.68        | 0.39                      | 6.4                  | 20.2                 | 0.36                   | 0.00        |
| <b>12052</b>   | <b>Pig suite. Variolitic, px-phyric, (38) report Fo71.</b>                                                | <b>2990</b> | <b>8.14</b>  | <b>19.82</b> | <b>0.423</b> | <b>0.71</b> | <b>0.42</b>               | <b>8.1</b>           | <b>19.8</b>          | <b>0.42</b>            | <b>0.00</b> |
| 12064          | Pig suite. Evolved px-bearing mare basalt, tr. fayalite only. Kushiro 1971.                               | 1950        | 6.6          | 19.83        | 0.372        | 0.65        | 0.36                      | 6.6                  | 19.8                 | 0.37                   | 0.00        |
| 14053          | Al suite. Very low fO <sub>2</sub> (39), ophitic texture, Mg Ol incl. in pig., Fo <sub>63</sub> .         | 2874        | 8.97         | 16.97        | 0.485        | 0.69        | 0.40                      | 5.8                  | 15.6                 | 0.40                   | 0.11        |
| 15016          | Ol suite. Vesicular - parent magma?; accumulated chr.                                                     | 6080        | 11.14        | 22.58        | 0.468        | 0.70        | 0.41                      | 8.7                  | 22.1                 | 0.41                   | 0.09        |
| <b>15386</b>   | <b>KREEP basalt.</b>                                                                                      | <b>2040</b> | <b>8.19</b>  | <b>10.60</b> | <b>0.579</b> |             |                           |                      |                      |                        |             |
| <b>15555</b>   | <b>Poikilitic plag - same mineralogy as 15016 - parent magma (40)</b>                                     | <b>4280</b> | <b>11.16</b> | <b>22.75</b> | <b>0.467</b> | <b>0.70</b> | <b>0.41</b>               | <b>8.8</b>           | <b>22.3</b>          | <b>0.41</b>            | <b>0.09</b> |
| <b>High Ti</b> |                                                                                                           |             |              |              |              |             |                           |                      |                      |                        |             |
| 10003          | Evolved basalt.                                                                                           | 1583        | 7.1          | 20.51        | 0.382        | 0.64        | 0.35                      | 7.1                  | 20.5                 | 0.38                   | 0.00        |
| <b>10017</b>   | <b>No olivine, no evidence for accumulation (41)</b>                                                      | <b>2330</b> | <b>7.72</b>  | <b>19.49</b> | <b>0.414</b> | <b>0.73</b> | <b>0.45</b>               | <b>7.7</b>           | <b>19.5</b>          | <b>0.41</b>            | <b>0.00</b> |
| <b>10050</b>   | <b>Minor olivine (1%), subophitic texture</b>                                                             | <b>2250</b> | <b>7.86</b>  | <b>19.29</b> | <b>0.421</b> | <b>0.68</b> | <b>0.39</b>               | <b>6.8</b>           | <b>18.9</b>          | <b>0.39</b>            | <b>0.04</b> |
| <b>10057</b>   |                                                                                                           | <b>2190</b> | <b>7.93</b>  | <b>19.24</b> | <b>0.424</b> | <b>0.69</b> | <b>0.40</b>               | <b>7.1</b>           | <b>19.0</b>          | <b>0.40</b>            | <b>0.03</b> |
| 10058          | Evolved basalt, no Ol (resorbed?), no chr., subophitic basalt. (42)                                       | 1410        | 6.11         | 19.60        | 0.357        | 0.65        | 0.36                      | 6.1                  | 19.6                 | 0.36                   | 0.00        |
| 10072          | Similar to 10017 except slightly less ilm and more plg (2%)                                               | 2390        | 7.87         | 19.76        | 0.415        | 0.69        | 0.40                      | 7.5                  | 19.6                 | 0.40                   | 0.01        |
| <b>70017</b>   | <b>Slowly-cooled. Highest Fo<sub>69</sub>; highest En<sub>75</sub></b>                                    | <b>3700</b> | <b>9.64</b>  | <b>18.32</b> | <b>0.484</b> | <b>0.75</b> | <b>0.47</b>               | <b>9.6</b>           | <b>18.3</b>          | <b>0.48</b>            | <b>0.00</b> |
| <b>70035</b>   |                                                                                                           | <b>3530</b> | <b>9.89</b>  | <b>18.50</b> | <b>0.488</b> | <b>0.75</b> | <b>0.47</b>               | <b>9.9</b>           | <b>18.5</b>          | <b>0.49</b>            | <b>0.00</b> |
| <b>70135</b>   | <b>3% ol</b>                                                                                              | <b>3921</b> |              |              |              |             |                           | <b>unknown</b>       |                      |                        |             |
| <b>70215</b>   | <b>7% ol, quenched liquid (fine-grained)</b>                                                              | <b>2680</b> | <b>8.52</b>  | <b>19.62</b> | <b>0.436</b> | <b>0.75</b> | <b>0.47</b>               | <b>8.5</b>           | <b>19.6</b>          | <b>0.44</b>            | <b>0.00</b> |
| <b>74275</b>   | <b>13 % olivine. Dunite xenoliths with Fo<sub>84</sub>. Highest olivine phenocryst is Fo<sub>80</sub></b> | <b>3830</b> | <b>10.26</b> | <b>18.25</b> | <b>0.501</b> | <b>0.8</b>  | <b>0.55</b>               | <b>10.3</b>          | <b>18.3</b>          | <b>0.50</b>            | <b>0.00</b> |
| <b>75055</b>   | <b>No olivine.</b>                                                                                        | <b>1847</b> | <b>6.84</b>  | <b>18.24</b> | <b>0.401</b> | <b>0.73</b> | <b>0.45</b>               | <b>6.8</b>           | <b>18.2</b>          | <b>0.40</b>            | <b>0.00</b> |

<sup>1</sup> Mg#, MgO or FeO content of the melt predicted by  $K_D^{\text{Fe-Mg}} = 0.3$  from Ol or Px composition. <sup>2</sup> Mg# of the melt calculated after fOl/px subtraction. Samples in **bold** meet selection criteria.

**Table S11.** Chromium isotope compositions of representative lunar samples.

| Sample              | $\delta^{53}\text{Cr}$ (‰) | $\pm$ (2SD)  |
|---------------------|----------------------------|--------------|
| 12016               | -0.222                     | 0.022        |
| 12052               | -0.191                     | 0.022        |
| 14053               | -0.238                     | 0.022        |
| 15386               | -0.158                     | 0.022        |
| 15555               | -0.203                     | 0.022        |
| 10017               | -0.216                     | 0.022        |
| 10050               | -0.263                     | 0.022        |
| 10057               | -0.211                     | 0.022        |
| 10057               | -0.243                     | 0.002        |
| 70017               | -0.178                     | 0.022        |
| 70035               | -0.257                     | 0.022        |
| 70135               | -0.196                     | 0.012        |
| 70215               | -0.218                     | 0.022        |
| 74275               | -0.227                     | 0.022        |
| 75055               | -0.171                     | 0.022        |
| 76535               | -0.253                     | 0.005        |
| 15426               | -0.186                     | 0.009        |
| <b>Average Moon</b> | <b>-0.212</b>              | <b>0.064</b> |

The Anderson-Darling test for normality on the lunar dataset has a D value of 0.150, which is smaller than the critical value,  $c$  of 0.714 (at a confidence level of 0.05). This attests that the data for the BSE is normally distributed and the 2SE value (0.033 ‰) can be used as an uncertainty of the mean value.

### Calculation of relative abundances of Cr-bearing gas species

The relative abundance of Cr-bearing gas species is calculated using three homogeneous equilibria:

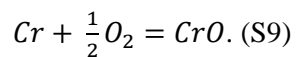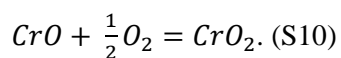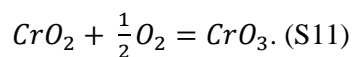

The equilibrium partial pressures were calculated using thermodynamic data from the JANAF tables (43).

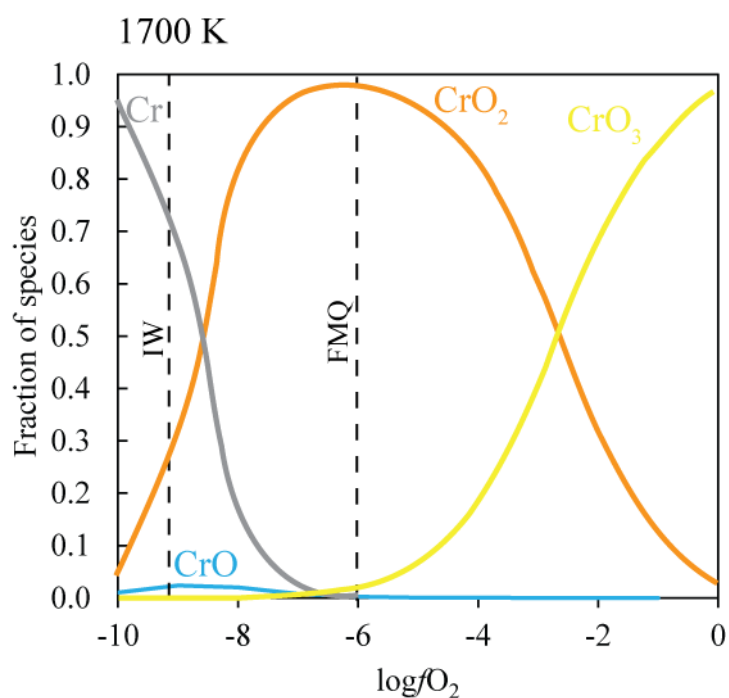

**Figure S2.** Relative abundances of Cr-bearing gas species at 1700 K, 1 bar assuming an ideal gas as calculated from thermodynamic data of (43).

### Calculation of Cr isotope fractionation factors of Cr-bearing gas species

In the simple approximation that vibrational frequencies, which are most affected by isotopic substitutions, are harmonic, the vibrational partition function for a diatomic molecule (here,  $^{53}\text{Cr}$  and  $^{52}\text{Cr}$  in  $\text{CrO}(\text{g})$ ), can be written (44):

$$\alpha_{\text{CrO}(\text{g})-\text{Cr}(\text{g})} = \frac{v_{^{53}\text{Cr}^{16}\text{O}}}{v_{^{52}\text{Cr}^{16}\text{O}}} \times \left( \frac{\exp\left[-\frac{hv_{^{53}\text{Cr}^{16}\text{O}}}{2k_B T}\right]}{1 - \exp\left[-\frac{hv_{^{53}\text{Cr}^{16}\text{O}}}{k_B T}\right]} \right) \times \left( \frac{1 - \exp\left[-\frac{hv_{^{52}\text{Cr}^{16}\text{O}}}{k_B T}\right]}{\exp\left[-\frac{hv_{^{52}\text{Cr}^{16}\text{O}}}{2k_B T}\right]} \right) \quad (\text{S12})$$

Where  $\nu$  is the vibrational frequency of the  $^{53}\text{Cr}^{16}\text{O}$  and  $^{52}\text{Cr}^{16}\text{O}$  bonds,  $h$  is Planck's constant,  $k_B$  is Boltzmann's constant and  $T$  is the absolute temperature. The vibrational frequency of the Cr-O bond for the abundance of natural Cr (molar mass 0.051996 kg/mol) is  $864 \text{ cm}^{-1}$  (45). Applying the formula for a single harmonic vibration;

$$\nu = \frac{1}{2\pi} \sqrt{k_s \left( \frac{1}{m_{\text{Cr}}} - \frac{1}{m_{\text{O}}} \right)} \quad (\text{S13})$$

which yields,  $\nu^{52}\text{Cr}^{16}\text{O}$  and  $\nu^{53}\text{Cr}^{16}\text{O}$ ,  $864.0 \text{ cm}^{-1}$  and  $862.1 \text{ cm}^{-1}$ , respectively. This gives:

$$10^3 \ln {}^{53/52}\text{Cr} \beta_{\text{CrO}} = 0.28 \times \frac{10^6}{T^2}. \quad (\text{S14})$$

In order to calculate the more complex molecules  $\text{CrO}_2(\text{g})$  (bent at  $130^\circ$  with  $\text{C}_{2v}$  symmetry) and  $\text{CrO}_3(\text{g})$  (trigonal at  $115^\circ$  with  $\text{C}_{3v}$  symmetry) bond valence theory coupled with Born-Landé potentials were used. In the harmonic approximation (3), the  $\beta$  factor for a given phase ( $i$ ) and isotope ratio ( $n/d$ ) may be related to the sum of all force constants in a bonding environment ( $K_f$ ) by a constant  $f$  that describes the quantum component of the partition function ratio, and is dependent on the relative mass difference between the two isotopes, and the absolute temperature ( $T$ ):

$$10^3 \ln {}^{n/d} \beta_i = f \frac{K_f}{T^2}. \quad (\text{S15})$$

The value of  $f$  is given by (see (3, 46)):

$$f = \frac{3N_A 10^3}{96\pi^2} \left( \frac{h}{k_B T} \right)^2 \left( \frac{1}{m_n} - \frac{1}{m_d} \right), \quad (\text{S16})$$

where  $N_A$  is Avogadro's number,  $h$  is Planck's constant,  $k_B$  Boltzmann's constant,  $m$  the molar mass. For the  $^{53}\text{Cr}/^{52}\text{Cr}$  ratio,  $f = 1594$ . Though model-dependent,  $\beta$  factors calculated in this manner are rather accurate with respect to NRIXS measurements of force constants (e.g. 47). Here  $K_f$ , is estimated by approximating the bonds between Cr-O as ionic, and hence applying Born-Landé potentials (48, 49):

$$K_f = \frac{1}{4\pi\epsilon_0} \frac{z_{\text{Cr}} z_{\text{O}} q^2 (B-1)}{r_{\text{Cr-O}}^3}. \quad (\text{S17})$$

Here,  $\epsilon_0$  is the permittivity of free space,  $z$  the formal charge,  $q$  the charge on an electron in coulombs,  $B$  the Born exponent and  $r$  the radius in metres. In order to match the calculation for Cr-O presented above,  $B$  was fixed at a value of 1.8 for gases and 2.7 for solids.

The results are shown in Table S12, and are in excellent accord. For example, the  $10^3 \ln \beta$  value for  $^{53}\text{Cr}/^{52}\text{Cr}$  in  $\text{Cr}_2\text{SiO}_4$  at 1000 K calculated in ref. (33) is 0.30, compared to 0.29 herein; likewise for  $\text{Cr}_2\text{O}_3$ , 0.53 vs. 0.50 herein. As a result, both the fractionation factor between solid and gas, and the absolute values of the solids have been benchmarked against DFT calculations, lending credence to the values calculated for Cr-bearing species herein. The variation of the  $^{53}\text{Cr}/^{52}\text{Cr}$   $10^3 \ln \beta$  factor for these species is summarised as a function of temperature in Figure S3.

**Table S12.** Input parameters and force constants of bond valence modelling.

| Species                               | $Z_M$ | $Z_O$ | $r_{\text{Cr-O}} \text{ (m)}$ | $K_{\text{f Cr-O}}$ | $10^3 \ln \beta \text{ (}\times 10^6/\text{T}^2\text{)}$ | Reference <sup>#</sup> |
|---------------------------------------|-------|-------|-------------------------------|---------------------|----------------------------------------------------------|------------------------|
| $\text{CrO}_{(\text{g})}$             | 2     | 2     | $1.62 \times 10^{-10}$        | 173.3               | 0.28                                                     | (45)                   |
| $\text{CrO}_{2(\text{g})}$            | 4     | 2     | $1.60 \times 10^{-10}$        | 359.2               | 0.57                                                     | (45)                   |
| $\text{CrO}_{3(\text{g})}$            | 6     | 2     | $1.58 \times 10^{-10}$        | 558.4               | 0.89                                                     | (45)                   |
| $\text{Cr}_2\text{SiO}_{4(\text{s})}$ | 2     | 2     | $2.05 \times 10^{-10}$        | 182.5               | 0.29                                                     | (50)                   |
| $\text{Cr}_2\text{O}_{3(\text{s})}$   | 3     | 2     | $1.96 \times 10^{-10}$        | 313.1               | 0.50                                                     | (51)                   |

#values for bond lengths

The hierarchy of partitioning of heavy isotopes into Cr-bearing phases decreases in the order:  $\text{CrO}_{3(\text{g})} > \text{CrO}_{2(\text{g})} > \text{Cr}_2\text{O}_{3(\text{s})} > \text{Cr}_2\text{SiO}_{4(\text{s})} \approx \text{CrO}_{(\text{g})} > \text{Cr}^0_{(\text{g})}$ .

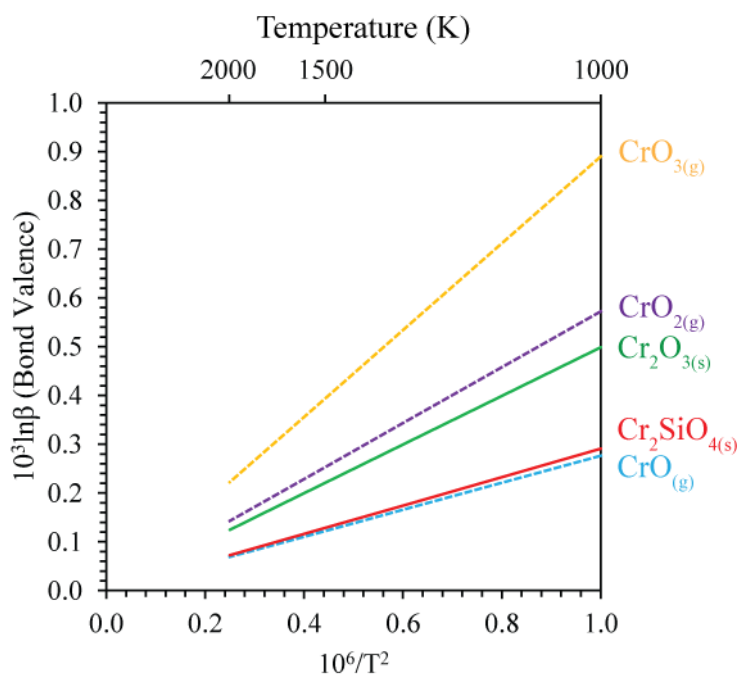

**Figure S3.** The  $^{53}\text{Cr}/^{52}\text{Cr}$   $10^3 \ln \beta$  factors calculated by the bond valence method (this work) for gases (dashed lines) and solids (solid lines) as a function of inverse temperature (K) squared.

## References

1. Nisbet EG, Cheadle MJ, Arndt NT, Bickle MJ (1993) Constraining the potential temperature of the Archaean mantle : A review of the evidence from komatiites. *Lithos* 30:291–307.
2. Green DH, Nicholls IA, Viljoen MJ, Viljoen RP (1975) Experimental Demonstration of the Existence of Peridotitic Liquids in Earliest Archean Magmatism. *Geology* 3:11–14.
3. Urey HC (1947) The thermodynamic properties of isotopic substances. *J Chem Soc*:562–581.
4. Sossi PA, et al. (2016) Petrogenesis and Geochemistry of Archean Komatiites. *J Petrol* 57(1):147–184.
5. Sossi PA, Nebel O, O'Neill HSC, Moynier F (2018) Zinc isotope composition of the Earth and its behaviour during planetary accretion. *Chem Geol* 477:73–84.
6. Badullovich N, Moynier F, Creech J, Teng F, Sossi PA (2017) Tin isotopic fractionation during igneous differentiation and Earth's mantle composition. *Geochemical Perspect Lett* 5:24–28.
7. Gall L, Williams HM, Halliday AN, Kerr AC (2017) Nickel isotope composition of the mantle. *Geochim Cosmochim Acta* 199:196–209.
8. Dauphas N, Teng F-Z, Arndt NT (2010) Magnesium and iron isotopes in 2.7 Ga Alexo komatiites: Mantle signatures, no evidence for Soret diffusion, and identification of diffusive transport in zoned olivine. *Geochim Cosmochim Acta* 74(11):3274–3291.
9. Delano JW (2001) Redox history of the Earth's interior since approximately 3900 Ma: implications for prebiotic molecules. *Orig Life Evol Biosph* 31(4-5):311–41.
10. Donaldson CH (1976) An experimental investigation of olivine morphology. *Contrib to Mineral Petrol* 57(2):187–213.
11. Faure F, Arndt NT, Libourel G (2006) Formation of Spinifex Texture in Komatiites: an Experimental Study. *J Petrol* 47(8):1591–1610.
12. Sossi PA, O'Neill HSC (2016) Liquidus temperatures of komatiites and the effect of cooling rate on element partitioning between olivine and komatiitic melt. *Contrib Mineral Petrol* 171(5):1–25.
13. Pyke DR, Naldrett AJ, Eckstrand OR (1973) Archean Ultramafic Flows in Munro Township, Ontario. *Geol Soc Am Bull* 84(3):955–978.
14. Tomlinson KY, et al. (1998) The Red Lake greenstone belt, Superior Province: evidence of plume-related magmatism at 3 Ga and evidence of an older enriched source. *Precambrian Res*



- 89:59–76.
15. Wiczorek M a. (2006) The Constitution and Structure of the Lunar Interior. *Rev Mineral Geochemistry* 60(1):221–364.
  16. Walker D, Longhi J, Hays JF (1976) Heterogeneity in titaniferous lunar basalts. *Earth Planet Sci Lett* 30(1):27–36.
  17. Poitrasson F, Halliday AN, Lee D, Levasseur S, Teutsch N (2004) Iron isotope differences between Earth , Moon , Mars and Vesta as possible records of contrasted accretion mechanisms. 223:253–266.
  18. Wang K, Jacobsen SB, Sedaghatpour F, Chen H, Korotev RL (2015) The earliest Lunar Magma Ocean differentiation recorded in Fe isotopes. *Earth Planet Sci Lett* 430:202–208.
  19. Sossi PA, Moynier F (2017) Chemical and isotopic kinship of iron in the Earth and Moon deduced from the lunar Mg-Suite. *Earth Planet Sci Lett* 471:125–135.
  20. McCallum IS, Schwartz JM (2001) Lunar Mg suite: Thermobarometry and petrogenesis of parental magmas. *J Geophys Res* 106(E11):27969.
  21. Shearer CK, Elardo SM, Petro NE, Borg LE, McCubin FM (2015) Origin of the lunar highlands Mg-suite: An integrated petrology, geochemistry, chronology, and remote sensing perspective. *Am Mineral* 100(1):294–325.
  22. Norman MD, Ryder G (1980) Geochemical constraints on the igneous evolution of the lunar crust. *Proc. Lunar and Planetary Science Conference, 11th* (Lunar and Planetary Science Institute, Houston), pp 317–331.
  23. Hess PC (1994) Petrogenesis of lunar troctolites. *J Geophys Res* 99:19083–19093.
  24. Wänke H, Dreibus G, Palme H (1978) Primary matter in the lunar highlands: The case of the siderophile elements. *Proc. Lunar Planet. Sci. Conf. 9th*, pp 83–110.
  25. Wasson JT, Boynton WV, Kallemeyn GW, Sundberg LL, Wai CM (1976) Volatile compounds released during lunar lava fountaining. *Proc Lunar Planet Sci Conf 7th*:1583–1595.
  26. Delano JW (1986) Abundances of cobalt, nickel, and volatiles in the silicate portion of the moon. *Origin of the Moon* (Lunar and Planetary Science Institute, Houston), pp 231–247.
  27. Dymek RF, Albee AL, Chodos AA (1975) Comparative petrology of lunar cumulate rocks of possible primary origin: Dunite 72415, troctolite 76535, norite 78235, and anorthosite 62237. *Proc Lunar Planet Sci Conf 6th*:301–341.
  28. Ryder G, Bower JF (1977) Petrology of Apollo 15 black-and-white rocks 15445 and 15455 -

- Fragments of the Imbrium impact melt sheet? *Lunar and Planetary Science Conference, 8th*, pp 1895–1923.
29. Berry AJ, O'Neill HSC, Scott DR, Foran GJ, Shelley JMG (2006) The effect of composition on Cr<sup>2+</sup>/Cr<sup>3+</sup> in silicate melts. *Am Mineral* 91(11-12):1901–1908.
  30. Toplis MJ (2005) The thermodynamics of iron and magnesium partitioning between olivine and liquid: criteria for assessing and predicting equilibrium in natural and experimental systems. *Contrib to Mineral Petrol* 149(1):22–39.
  31. Hanson B, Jones JH (1998) The systematics of Cr<sup>3+</sup> and Cr<sup>2+</sup> partitioning between olivine and liquid in the presence of spinel. *Am Mineral* 83:669–684.
  32. Barnes SJ (1986) The distribution of chromium among orthopyroxene, spinel and silicate liquid at atmospheric pressure. *Geochim Cosmochim Acta* 50(9):1889–1909.
  33. Moynier F, Yin Q-Z, Schauble E (2011) Isotopic evidence of Cr partitioning into Earth's core. *Science* 331(6023):1417–20.
  34. Schoenberg R, Zink S, Staubwasser M, von Blanckenburg F (2008) The stable Cr isotope inventory of solid Earth reservoirs determined by double spike MC-ICP-MS. *Chem Geol* 249(3-4):294–306.
  35. Schoenberg R, et al. (2016) The stable Cr isotopic compositions of chondrites and silicate planetary reservoirs. *Geochim Cosmochim Acta* 183:14–30.
  36. Bonnand P, Parkinson IJ, Anand M (2016) Mass dependent fractionation of stable chromium isotopes in mare basalts: Implications for the formation and the differentiation of the Moon. *Geochim Cosmochim Acta* 175:208–221.
  37. Keil K, Prinz M, Bunch TE (1971) Mineralogy, petrology, and chemistry of some Apollo 12 samples. *Proceedings of the Second Lunar Science Conference* (Lunar and Planetary Science Institute, Houston), pp 319–341.
  38. Champness PE, Lorimer GW (1971) An electron microscopic study of a lunar pyroxene. *Contrib Mineral Petrol* 33(3):171–83.
  39. Bence AE, Papike JJ (1972) Pyroxenes as recorders of lunar basalt petrogenesis: Chemical trends due to crystal-liquid interaction. *Proc Third Lunar Sci Conf* 1:431–469.
  40. Walker D, et al. (1977) Slowly cooled microgabbros 15555 and 15065. *Proc. Lunar and Planetary Science Conference, 8th* (Lunar and Planetary Science Institute, Houston), pp 1521–1547.

41. French BM, Walter LS, Heinrich KJF (1970) Quantitative mineralogy of an Apollo 11 lunar sample. *Proceedings of the Apollo 11 Lunar Science Conference* (Lunar and Planetary Science Institute, Houston), pp 433–444.
42. Beatty DW, Albee AL (1978) Comparative petrology and possible genetic relations among the Apollo 11 basalts. *Proc. Lunar and Planetary Science Conference, 9th* (Lunar and Planetary Science Institute, Houston), p 359–463.
43. Chase MW (1998) NIST-JANAF Thermochemical Tables, 4th Ed. J. Phys. Chem. Ref. Data. 1998, Monograph 9(Part I and Part II). *J Phys Chem Ref Data Monograph:Part I&II*.
44. Schauble EA (2004) Applying Stable Isotope Fractionation Theory to New Systems. *Reviews in Mineralogy and Geochemistry: Geochemistry of Non-Traditional Stable Isotopes*, eds Johnson CM, Beard BL, Albarède F (Mineralogical Society of America, Washington DC), pp 65–111. 55th Ed.
45. Espelid O, Borve KJ, Jensen VR (1998) Structure and thermodynamics of gaseous oxides, hydroxides, and mixed oxohydroxides of chromium:  $\text{CrO}_m(\text{OH})_n$  ( $m, n = 0-2$ ) and  $\text{CrO}_3$ . A computational study. *J Phys Chem A* 102(50):10414–10423.
46. Young ED, Galy A, Nagahara H (2002) Kinetic and equilibrium mass-dependent isotope fractionation laws in nature and their geochemical and cosmochemical significance. *Geochim Cosmochim Acta* 66(6):1095–1104.
47. Blanchard M, et al. (2009) Iron isotope fractionation between pyrite ( $\text{FeS}_2$ ), hematite ( $\text{Fe}_2\text{O}_3$ ) and siderite ( $\text{FeCO}_3$ ): A first-principles density functional theory study. *Geochim Cosmochim Acta* 73(21):6565–6578.
48. Born M, Mayer JE (1932) Zur Gittertheorie der Ionenkristalle. *Zeitschrift für Physik* 75(1):1–18.
49. Young ED, Tonui E, Manning CE, Schauble EA, Macris CA (2009) Spinel–olivine magnesium isotope thermometry in the mantle and implications for the Mg isotopic composition of Earth. *Earth Planet Sci Lett* 288:524–533.
50. Dollase WA, Seifert F, O'Neill HSC (1994) Structure of  $\text{Cr}_2\text{SiO}_4$  and possible metal-metal interactions in crystal and melt. *Phys Chem Miner* 21(1):104–109.
51. Finger LW, Hazen RM (1980) Crystal structure and isothermal compression of  $\text{Fe}_2\text{O}_3$ ,  $\text{Cr}_2\text{O}_3$ , and  $\text{V}_2\text{O}_3$  to 50 kbars. *J Appl Phys* 51(10):5362–5367.
